# Supplementary material for: Bio-Fertilizers Based on Digestate and Biomass Ash as an Alternative to Commercial Fertilizers—The Case of Tomato
Source: MDPI journal article supplement (doi:10.3390/agronomy11091716), 2021-08-27
Supplement: s1 [file s1]

## Supplementary Material (Appendix): Bio-fertilizers based on digestate and biomass ash as an alternative to commercial fertilizers – the case of tomato

Katarzyna Przygocka-Cyna<sup>1</sup>, Przemysław Barłóg<sup>1</sup>, Tomasz Spizewski \* <sup>2</sup>, Witold Grzebisz<sup>1</sup>

Department of Agricultural Chemistry and Environmental Biogeochemistry, Poznań University of Life Sciences, Wojska Polskiego 38/42, 60-625 Poznań, Poland; <sup>2</sup> Department of Vegetables

Production, Poznań University of Life Sciences, Wojska Polskiego 71F, 60-625 Poznań, Poland

\* Correspondence: e-mail@e-mail.com; tomasz.spizewski@up.poznan.pl

**Table S1.** The results of ANOVA analysis: yield, yield components and quality of tomato fruits (*F* ratios)

| Factors        | Degrees of freedom | Parameters |          |         |         |          |          |         |       |        |        |        |
|----------------|--------------------|------------|----------|---------|---------|----------|----------|---------|-------|--------|--------|--------|
|                |                    | TY         | CY       | TFW     | CFW     | TFN      | CFN      | EX      | TS    | CRD    | LCP    | DM     |
| Year (Y)       | 2                  | 171.4***   | 162.6*** | 16.2*** | 18.1*** | 216.8*** | 222.7*** | 10.5*** | 0.8   | 1.4    | 0.3    | 0.9    |
| Treatments (K) | 13                 | 2.1*       | 1.8      | 0.9     | 0.7     | 1.9*     | 1.5      | 2.7**   | 2.7** | 4.1*** | 3.4*** | 3.2*** |
| Y x T          | 26                 | 0.4        | 0.5      | 0.9     | 1.0     | 0.4      | 0.5      | 0.5     | 0.4   | 1.0    | 0.4    | 0.3    |
| Error          | 84                 |            |          |         |         |          |          |         |       |        |        |        |

\*\*\*, \*\*, \* significant at  $p < 0.001$ ;  $p < 0.01$ ;  $p < 0.05$ , respectively. Explanation of abbreviations: TY – total yield; CY – commercial yield; TFW - total weight of the fruit; CFW - commercial weight of the fruit; TFN – total number of fruits; CFN –number of commercial; EX – extract; TS - total sugar; CRD – carotenoids; LCP – lycopene; DM – dry matter.

**Table S2.** Effect of the year on tomato yield, yield components and quality of tomato fruits

| Year | Parameters               |                          |                    |                    |                            |                            |                          |                          |                            |                            |                          |
|------|--------------------------|--------------------------|--------------------|--------------------|----------------------------|----------------------------|--------------------------|--------------------------|----------------------------|----------------------------|--------------------------|
|      | TY<br>t ha <sup>-1</sup> | CY<br>t ha <sup>-1</sup> | TFW<br>g           | CFW<br>g           | TFN<br>No. m <sup>-2</sup> | CFN<br>No. m <sup>-2</sup> | EX<br>g kg <sup>-1</sup> | TS<br>g kg <sup>-1</sup> | CRD<br>mg kg <sup>-1</sup> | LCP<br>mg kg <sup>-1</sup> | DM<br>g kg <sup>-1</sup> |
| 2016 | 95.4 <sup>b</sup>        | 74.3 <sup>b</sup>        | 157.9 <sup>b</sup> | 172.5 <sup>b</sup> | 61.0 <sup>b</sup>          | 43.4 <sup>b</sup>          | 45.3 <sup>a</sup>        | 34.4                     | 346.3                      | 246.9                      | 61.7                     |
| 2017 | 173.7 <sup>a</sup>       | 125.4 <sup>a</sup>       | 158.8 <sup>b</sup> | 161.0 <sup>c</sup> | 109.4 <sup>a</sup>         | 77.9 <sup>a</sup>          | 45.4 <sup>a</sup>        | 34.0                     | 361.4                      | 249.1                      | 62.3                     |
| 2018 | 92.7 <sup>b</sup>        | 57.7 <sup>c</sup>        | 174.7 <sup>a</sup> | 180.8 <sup>a</sup> | 53.2 <sup>c</sup>          | 31.9 <sup>c</sup>          | 44.3 <sup>b</sup>        | 35.1                     | 363.6                      | 253.0                      | 61.4                     |

Means within a column followed by the same letter indicate a lack of significant difference between the treatments. Explanation of abbreviations: TY – total yield; CY – commercial yield; TFW - total weight of one fruit; CFW - commercial weight of one fruit; TFN – total number of fruits; CFN –number of commercial; EX – extract; TS - total sugar; CRD – carotenoids; LCP – lycopene; DM – dry matter.

**Table S3.** Effect of interaction between year and treatments on total yield (TY), commercial yield of tomato (CY) and content of nitrogen and potassium in tomato fruits

| Year | Treatment        | TY<br>t ha <sup>-1</sup> | CY<br>t ha <sup>-1</sup> | N<br>g kg <sup>-1</sup> | K<br>g kg <sup>-1</sup> |
|------|------------------|--------------------------|--------------------------|-------------------------|-------------------------|
| 2016 | Absolute control | 82.5                     | 63.3                     | 32.9 <sup>abcd</sup>    | 37.5 <sup>fgh</sup>     |
|      | Mineral control  | 111.0                    | 91.6                     | 31.1 <sup>abcd</sup>    | 42.0 <sup>bcd</sup>     |
|      | A200             | 90.1                     | 68.2                     | 27.9 <sup>cd</sup>      | 40.6 <sup>f</sup>       |
|      | A400             | 94.2                     | 73.8                     | 33.1 <sup>abcd</sup>    | 40.6 <sup>f</sup>       |
|      | A800             | 95.4                     | 69.9                     | 31.4 <sup>abcd</sup>    | 40.8 <sup>f</sup>       |
|      | A1600            | 98.1                     | 77.5                     | 32.2 <sup>abcd</sup>    | 41.5 <sup>cd</sup>      |
|      | B200             | 86.1                     | 69.3                     | 34.0 <sup>abcd</sup>    | 41.4 <sup>df</sup>      |
|      | B400             | 88.7                     | 65.4                     | 30.6 <sup>abcd</sup>    | 41.4 <sup>df</sup>      |
|      | B800             | 94.4                     | 71.8                     | 31.8 <sup>abcd</sup>    | 40.9 <sup>f</sup>       |
|      | B1600            | 96.3                     | 72.4                     | 33.8 <sup>abcd</sup>    | 41.0 <sup>f</sup>       |
|      | C200             | 96.9                     | 79.3                     | 35.1 <sup>abcd</sup>    | 38.5 <sup>fg</sup>      |
|      | C400             | 103.8                    | 78.7                     | 29.0 <sup>bcd</sup>     | 41.6 <sup>cd</sup>      |
|      | C800             | 105.4                    | 86.7                     | 33.6 <sup>abcd</sup>    | 41.4 <sup>df</sup>      |
|      | C1600            | 93.1                     | 72.1                     | 30.8 <sup>abcd</sup>    | 40.8 <sup>f</sup>       |
| 2017 | Absolute control | 167.1                    | 120.5                    | 32.3 <sup>abcd</sup>    | 28.2 <sup>j</sup>       |
|      | Mineral control  | 195.5                    | 133.4                    | 30.8 <sup>abcd</sup>    | 31.4 <sup>ij</sup>      |
|      | A200             | 161.7                    | 116.9                    | 26.8 <sup>d</sup>       | 33.0 <sup>hij</sup>     |
|      | A400             | 199.5                    | 146.0                    | 33.6 <sup>abcd</sup>    | 28.5 <sup>j</sup>       |
|      | A800             | 190.6                    | 138.0                    | 34.1 <sup>abcd</sup>    | 35.5 <sup>ghi</sup>     |
|      | A1600            | 192.0                    | 139.9                    | 35.5 <sup>abc</sup>     | 35.2 <sup>ghi</sup>     |
|      | B200             | 157.3                    | 111.5                    | 27.6 <sup>cd</sup>      | 28.8 <sup>j</sup>       |
|      | B400             | 155.4                    | 110.6                    | 30.3 <sup>bcd</sup>     | 32.0 <sup>ij</sup>      |
|      | B800             | 163.2                    | 118.3                    | 33.3 <sup>abcd</sup>    | 31.9 <sup>ij</sup>      |
|      | B1600            | 172.9                    | 125.6                    | 34.8 <sup>abcd</sup>    | 32.5 <sup>ij</sup>      |
|      | C200             | 183.7                    | 135.1                    | 35.7 <sup>abc</sup>     | 32.4 <sup>ij</sup>      |
|      | C400             | 169.3                    | 123.5                    | 34.3 <sup>abcd</sup>    | 33.1 <sup>hij</sup>     |
|      | C800             | 165.0                    | 120.7                    | 36.3 <sup>ab</sup>      | 33.1 <sup>hij</sup>     |
|      | C1600            | 159.1                    | 116.0                    | 33.9 <sup>abcd</sup>    | 32.2 <sup>ij</sup>      |
| 2018 | Absolute control | 93.0                     | 52.9                     | 31.3 <sup>abcd</sup>    | 46.4 <sup>abc</sup>     |
|      | Mineral control  | 115.7                    | 59.0                     | 30.2 <sup>bcd</sup>     | 48.7 <sup>a</sup>       |
|      | A200             | 86.1                     | 53.1                     | 28.7 <sup>bcd</sup>     | 46.2 <sup>abcd</sup>    |
|      | A400             | 120.8                    | 82.5                     | 29.0 <sup>bcd</sup>     | 46.5 <sup>ab</sup>      |
|      | A800             | 106.5                    | 74.9                     | 32.1 <sup>abcd</sup>    | 48.0 <sup>a</sup>       |
|      | A1600            | 94.6                     | 55.0                     | 29.3 <sup>bcd</sup>     | 47.8 <sup>a</sup>       |
|      | B200             | 63.2                     | 41.9                     | 32.4 <sup>abcd</sup>    | 48.2 <sup>a</sup>       |
|      | B400             | 82.4                     | 45.2                     | 31.0 <sup>abcd</sup>    | 47.9 <sup>a</sup>       |
|      | B800             | 85.9                     | 54.4                     | 31.7 <sup>abcd</sup>    | 47.9 <sup>a</sup>       |
|      | B1600            | 95.2                     | 64.5                     | 35.2 <sup>abc</sup>     | 49.2 <sup>a</sup>       |
|      | C200             | 97.1                     | 59.9                     | 33.5 <sup>abcd</sup>    | 50.6 <sup>a</sup>       |
|      | C400             | 87.3                     | 54.0                     | 34.5 <sup>abcd</sup>    | 48.4 <sup>a</sup>       |
|      | C800             | 84.6                     | 53.3                     | 38.9 <sup>a</sup>       | 49.5 <sup>a</sup>       |
|      | C1600            | 84.9                     | 57.4                     | 32.8 <sup>abcd</sup>    | 49.3 <sup>a</sup>       |

Means within a column followed by the same letter indicate a lack of significant difference between the treatments.

**Table S4.** The results of ANOVA analysis: content of nutrients, lead and cadmium (*F* ratios)

| Factors        | Degrees of freedom | Elements |     |           |         |         |          |        |      |     |         |         |         |
|----------------|--------------------|----------|-----|-----------|---------|---------|----------|--------|------|-----|---------|---------|---------|
|                |                    | N        | P   | K         | Mg      | Ca      | Na       | Zn     | Cu   | Mn  | Fe      | Pb      | Cd      |
| Year (Y)       | 2                  | 1.3      | 0.4 | 1248.0*** | 16.8*** | 44.1*** | 937.5*** | 8.4*** | 3.6* | 1.5 | 66.8*** | 18.5*** | 54.8*** |
| Treatments (K) | 13                 | 5.9***   | 1.6 | 5.6***    | 1.3     | 0.5     | 0.6      | 1.3    | 1.8  | 1.6 | 1.2     | 0.7     | 1.0     |
| Y × T          | 26                 | 1.8*     | 0.7 | 2.7***    | 0.6     | 1.0     | 0.6      | 1.1    | 1.1  | 0.9 | 1.1     | 0.7     | 0.6     |
| Error          | 84                 |          |     |           |         |         |          |        |      |     |         |         |         |

\*\*\*, \*\*, \* significant at  $p < 0.001$ ;  $p < 0.01$ ;  $p < 0.05$ , respectively.

**Table S5.** Effect of the year on nutrients, lead and cadmium content in tomato fruits

| Year | Elements |      |                   |                   |                   |                   |                   |                   |      |                   |                   |                    |
|------|----------|------|-------------------|-------------------|-------------------|-------------------|-------------------|-------------------|------|-------------------|-------------------|--------------------|
|      | N        | P    | K                 | Mg                | Ca                | Na                | Zn                | Cu                | Mn   | Fe                | Pb                | Cd                 |
| 2016 | 31.9     | 0.42 | 40.7 <sup>b</sup> | 2.10 <sup>b</sup> | 0.53 <sup>c</sup> | 0.35 <sup>b</sup> | 1.81 <sup>b</sup> | 0.79 <sup>b</sup> | 1.94 | 4.84 <sup>b</sup> | 0.21 <sup>b</sup> | 0.024 <sup>b</sup> |
| 2017 | 32.8     | 0.44 | 32.0 <sup>c</sup> | 2.20 <sup>b</sup> | 0.88 <sup>a</sup> | 0.56 <sup>a</sup> | 2.00 <sup>b</sup> | 0.85 <sup>a</sup> | 1.65 | 7.49 <sup>a</sup> | 0.79 <sup>a</sup> | 0.034 <sup>a</sup> |
| 2018 | 32.2     | 0.42 | 48.2 <sup>a</sup> | 2.34 <sup>a</sup> | 0.67 <sup>b</sup> | 0.35 <sup>b</sup> | 2.31 <sup>a</sup> | 0.87 <sup>a</sup> | 1.81 | 5.10 <sup>b</sup> | 0.21 <sup>b</sup> | 0.024 <sup>b</sup> |

Means within a column followed by the same letter indicate a lack of significant difference between the treatments.

**Table S6.** Matrix of Pearson's correlation coefficients between tomato yield, yield components and quality parameters (n = 11)

| Parameter | TY      | CY      | TFW    | CFW   | TFN     | CFN   | EX     | TS   | CRD     | LCP  |
|-----------|---------|---------|--------|-------|---------|-------|--------|------|---------|------|
| CY        | 0.95*** |         |        |       |         |       |        |      |         |      |
| TFW       | 0.38    | 0.40    |        |       |         |       |        |      |         |      |
| CFW       | 0.32    | 0.40    | 0.74** |       |         |       |        |      |         |      |
| TFN       | 0.95*** | 0.90*** | 0.08   | 0.10  |         |       |        |      |         |      |
| CFN       | 0.94*** | 0.97*** | 0.21   | 0.16  | 0.94*** |       |        |      |         |      |
| EX        | -0.47   | -0.38   | -0.01  | 0.08  | -0.48   | -0.39 |        |      |         |      |
| TS        | -0.07   | -0.09   | 0.20   | 0.20  | -0.13   | -0.12 | 0.70** |      |         |      |
| CRD       | 0.04    | 0.05    | 0.18   | 0.16  | 0.01    | 0.03  | 0.24   | 0.25 |         |      |
| LCP       | 0.08    | 0.09    | 0.06   | 0.14  | 0.08    | 0.07  | 0.08   | 0.19 | 0.94*** |      |
| DM        | -0.36   | -0.29   | -0.04  | -0.17 | -0.34   | -0.25 | 0.49   | 0.28 | 0.42    | 0.30 |

\*\*\*, \*\*, \* significant at  $p < 0.001$ ;  $p < 0.01$ ;  $p < 0.05$ , respectively. Explanation of abbreviations: TY – total yield; CY – commercial yield; TFW - total weight of one fruit; CFW - commercial weight of one fruit; TFN – total number of fruits; CFN –number of commercial; EX – extract; TS - total sugar; CRD – carotenoids; LCP – lycopene; DM – dry matter.

**Table S7.** Matrix of Pearson's correlation coefficients between commercial yield of tomato (CY) and content of elements in fruits (n = 11)

| Element | CY     | N     | P     | K     | Mg    | Ca    | Na    | Zn      | Cu   | Mn    | Fe   | Pb   |
|---------|--------|-------|-------|-------|-------|-------|-------|---------|------|-------|------|------|
| N       | 0.30   |       |       |       |       |       |       |         |      |       |      |      |
| P       | 0.06   | 0.28  |       |       |       |       |       |         |      |       |      |      |
| K       | 0.21   | 0.30  | 0.21  |       |       |       |       |         |      |       |      |      |
| Mg      | 0.15   | 0.39  | 0.26  | 0.60* |       |       |       |         |      |       |      |      |
| Ca      | -0.20  | 0.22  | 0.45  | 0.42  | 0.27  |       |       |         |      |       |      |      |
| Na      | 0.18   | -0.08 | 0.17  | 0.50  | 0.46  | 0.18  |       |         |      |       |      |      |
| Zn      | 0.02   | 0.39  | 0.07  | 0.29  | 0.37  | -0.02 | 0.63* |         |      |       |      |      |
| Cu      | -0.23  | -0.05 | 0.15  | 0.11  | 0.54* | -0.22 | 0.38  | 0.44    |      |       |      |      |
| Mn      | 0.06   | 0.58* | 0.10  | 0.33  | 0.29  | 0.16  | 0.50  | 0.92*** | 0.11 |       |      |      |
| Fe      | -0.22  | 0.51  | 0.15  | 0.42  | 0.58* | 0.26  | 0.21  | 0.56*   | 0.27 | 0.62* |      |      |
| Pb      | -0.54* | -0.04 | -0.23 | -0.34 | 0.15  | -0.23 | -0.02 | 0.30    | 0.49 | 0.18  | 0.27 |      |
| Cd      | -0.08  | 0.31  | 0.05  | 0.05  | 0.20  | -0.30 | 0.20  | 0.74**  | 0.39 | 0.63* | 0.52 | 0.20 |

\*\*\*, \*\*, \* significant at  $p < 0.001$ ;  $p < 0.01$ ;  $p < 0.05$ , respectively.
